# Supplementary material
Source: PubMed Central journal article supplement (PMC2867368)

### Supplementary Figure 1

At the beginning of the studies and every time that a new batch of antibody for nitrotyrosine was purchased, the antibody was tested for its specificity towards nitrotyrosine (examples shown below). To this end, the reactivity of the antibody against nitrated mitochondrial proteins and amino-containing mitochondrial proteins was tested (Supplementary Figure 1) without or with previous reduction of the nitro group to amino by using either ascorbic acid (A) or sodium dithionite (not shown). In addition, its reactivity towards nonnitrated, recombinant proteins (B) and nitrated molecular weight markers (+) was also tested.

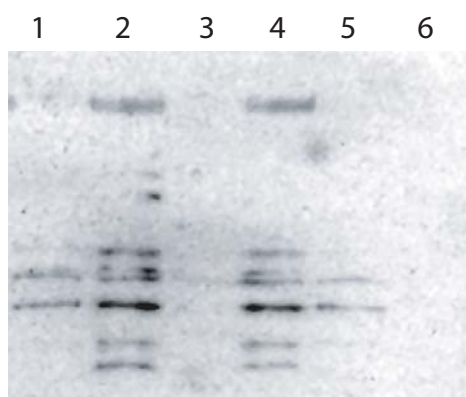

#### PANEL A

Western blot of nitrated mitochondrial proteins  
One-mg of rat liver mitochondria was pretreated with 0 (lanes 2 & 4), 1 (lanes 1 & 5), 10 (lane 3), and 100 (lane 6) mM ascorbic acid or 0, 1, 5, and 10 mM sodium dithionite (not shown) for 5-6 min on ice. Then the samples were diluted with PBS, and treated with Laemmli buffer. One microgram of each sample was loaded onto a 12.5% Tris-Gly SDS-PAGE. The gel was electrotransferred to a PVDF membrane and probed with anti-nitroTyr monoclonal antibody (Upstate; cat #5-233, Lot 23305, clone 1A6).

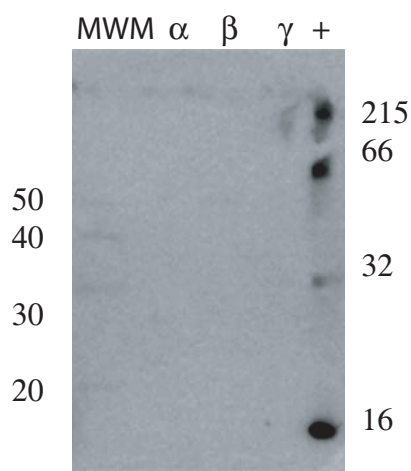

#### PANEL B

Western blot of ATPase recombinant proteins  
One microgram of recombinant alpha, beta and gamma subunits were loaded onto a 12.5% Tris-Gly SDS-PAGE. The gel was electrotransferred to a PVDF membrane and probed with anti-nitroTyr monoclonal antibody (Upstate; cat #5-233, Lot 23305, clone 1A6).  
Abbreviations: MWM, molecular weight markers in kDa.  
+: Positive control constituted by nitrated proteins of known MW.

Supplemental Figure 3: Analysis of the peptide masses obtained by MALDI-ToF indicating those peptides that had been modified by the treatment

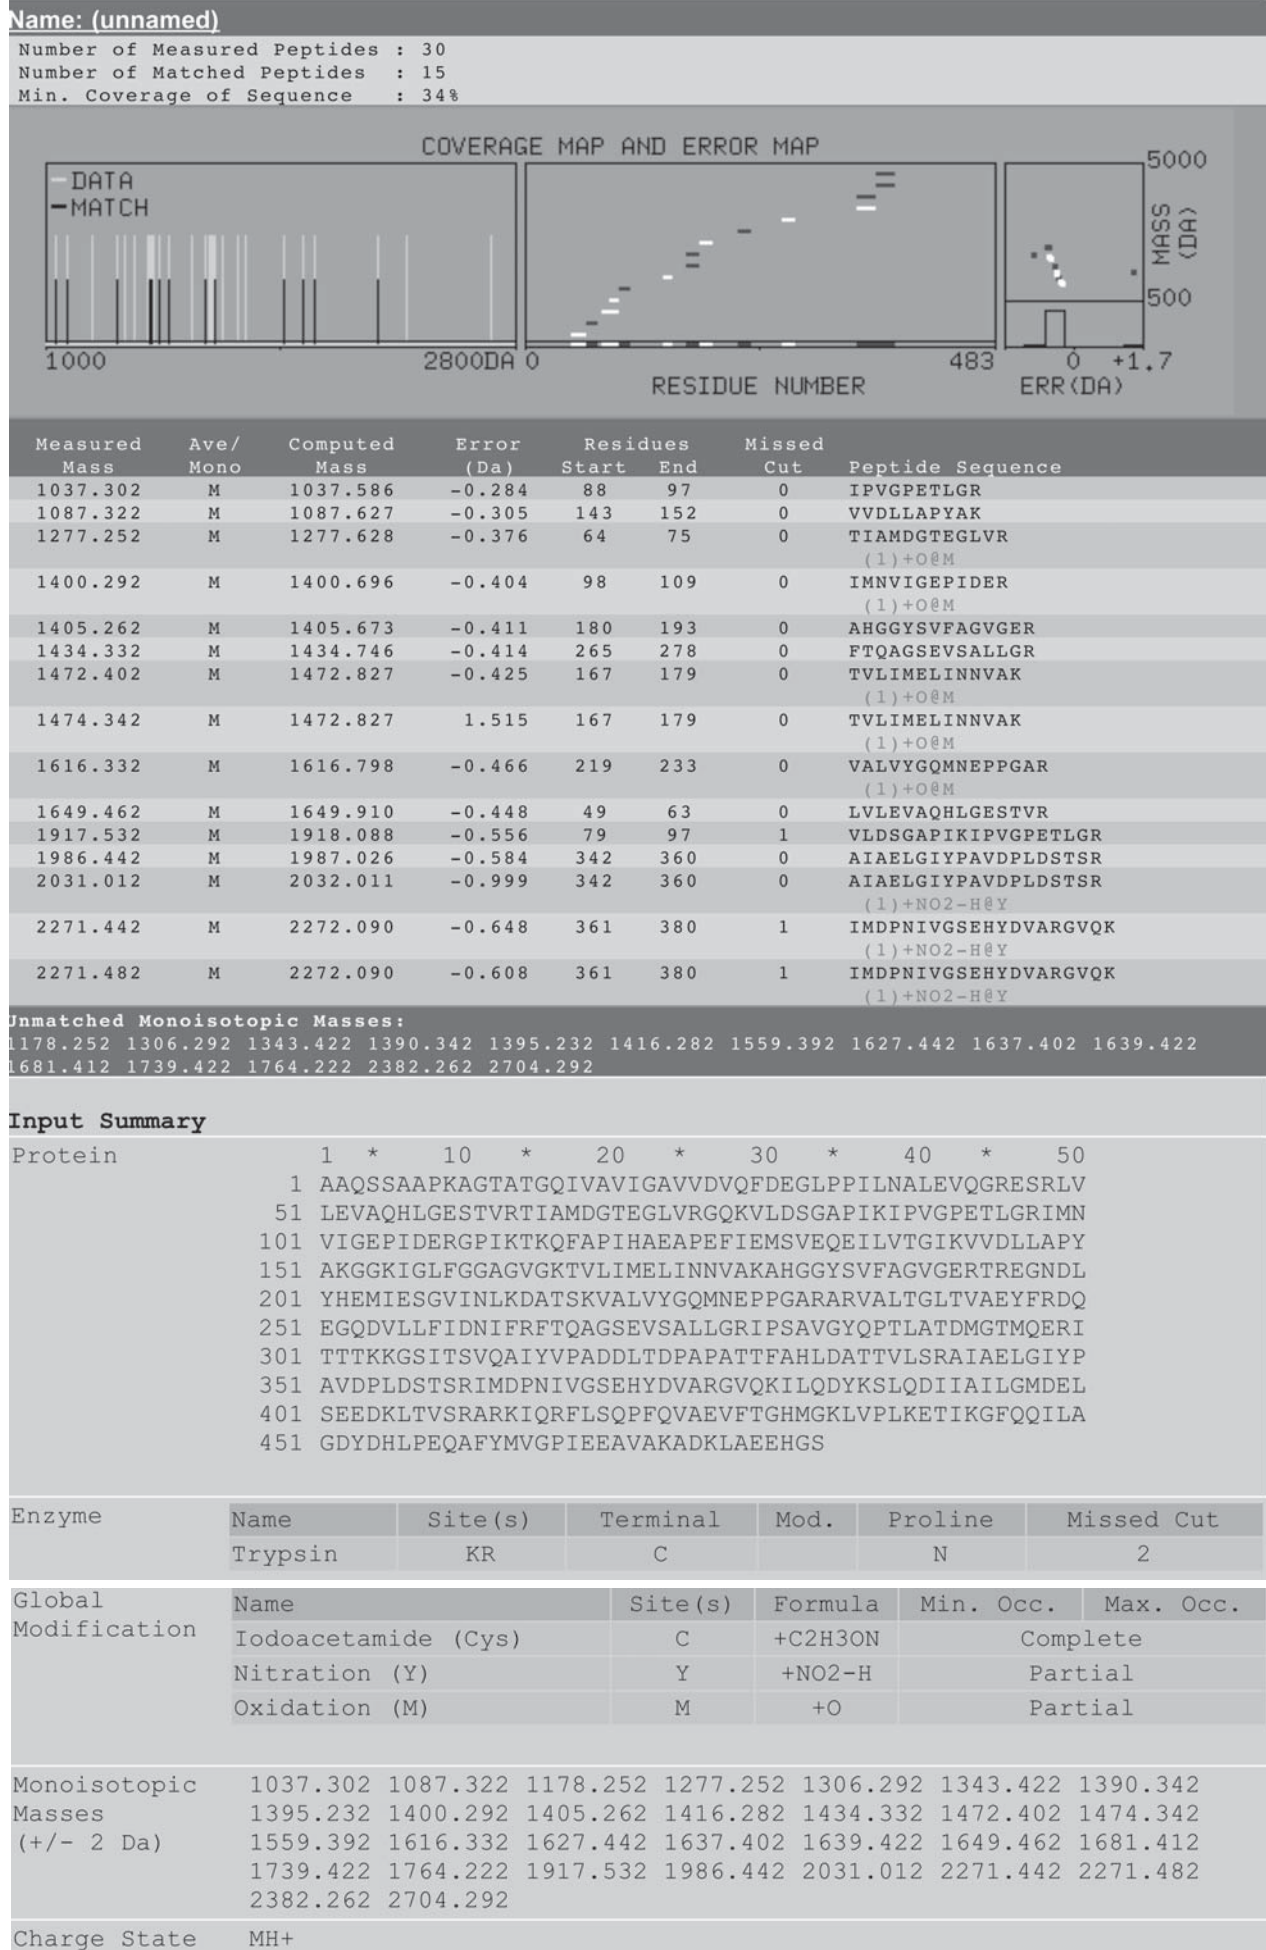

Supplementary figure 4 Example of one of the MS/MS spectrum obtained with one of the peptides that showed nitration in the MALDI-ToF analysis

A.. MS/MS Spectrum of peptide with mass 2032.01

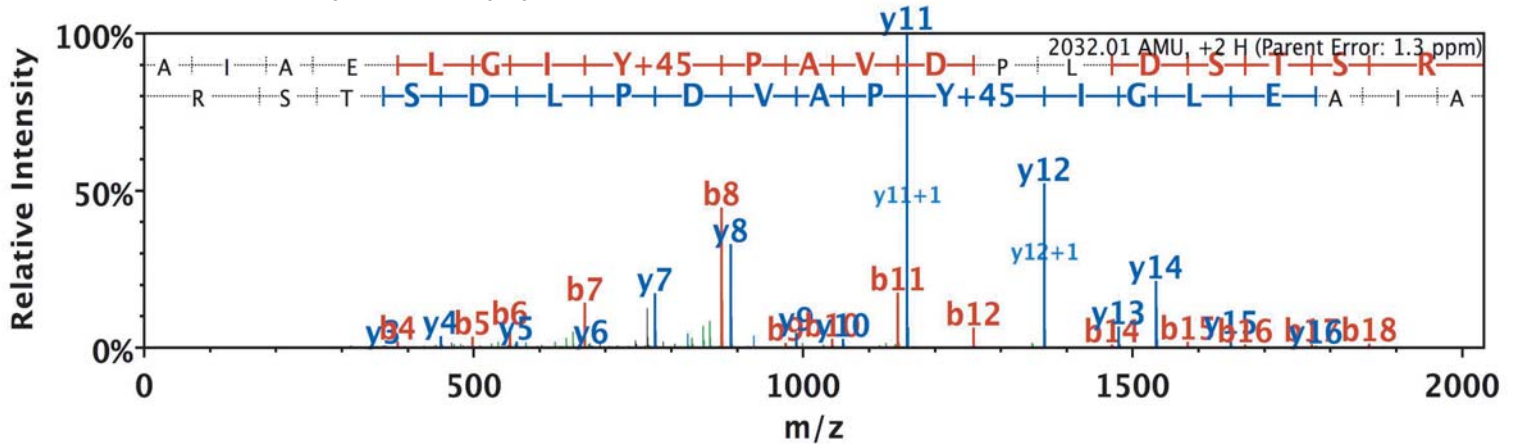

B. Error spectrum/model of the above spectrum

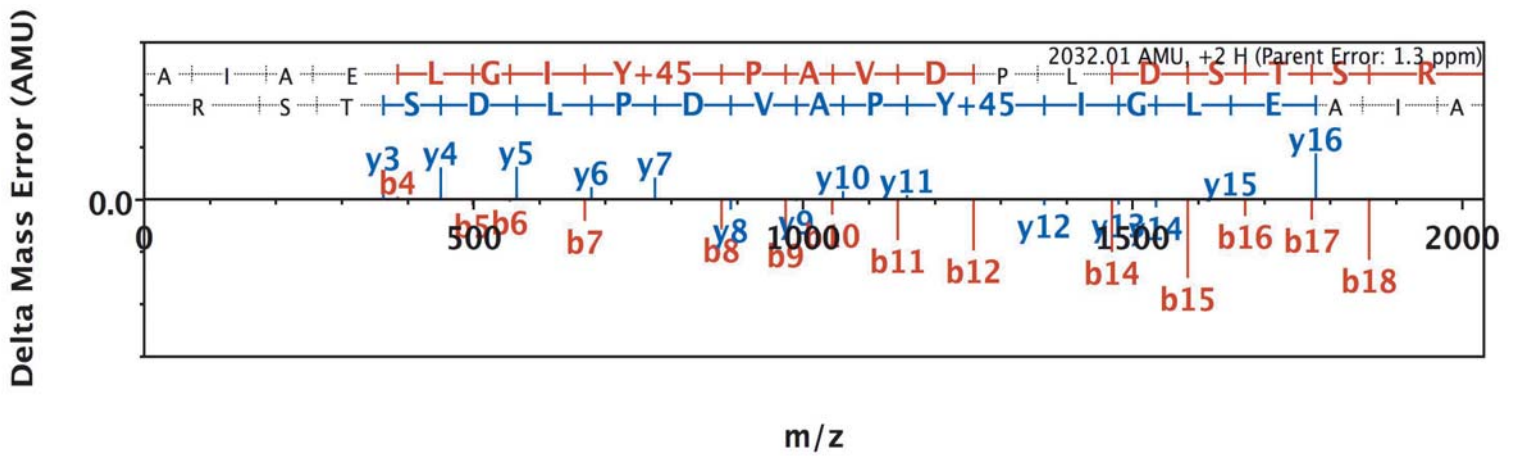

Supplement: 00739.2009_1.pdf [file 00739.2009_1.pdf]
